# Supplementary material for: COL4A3 expression in asthmatic epithelium depends on intronic methylation and ZNF263 binding
Source: PubMed Central journal article supplement — ERJ Open Res. 2021 Jun 7;7(2):00802-2020. doi: 10.1183/23120541.00802-2020 (PMC8181658; doi:10.1183/23120541.00802-2020), 2021-06-07
Supplement: 00802-2020.supplement_figures.pdf [file 00802-2020.supplement_figures.pdf]

# Supplement figure 1

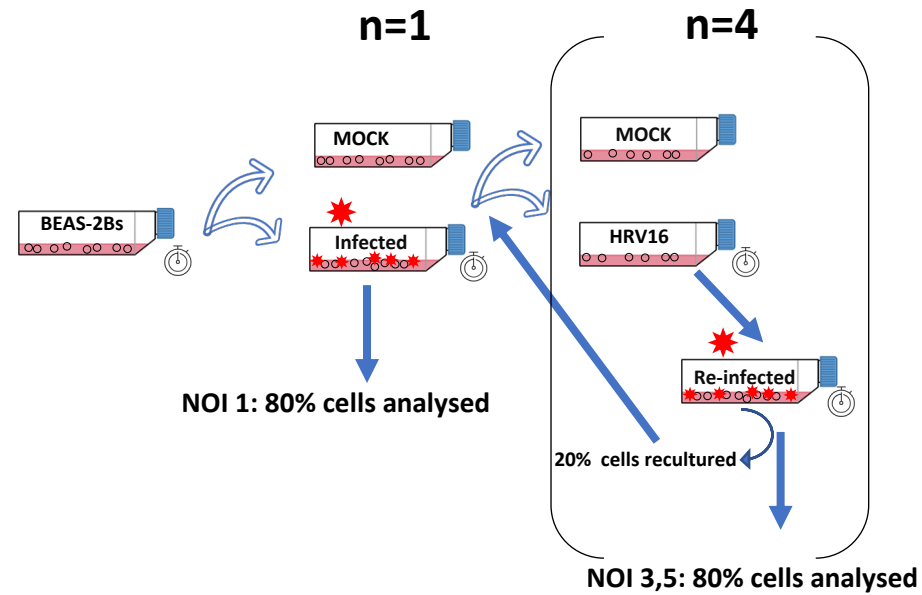

 cells grown to 80% confluency

 HRV-16

**MOCK** - No virus

## Schematic depicting *in vitro* experimental model of five consecutive infections of BEAS-2B cells with HRV- 16.

BEAS-2B cells were seeded at  $2 \times 10^6$  per T25 flask and cultured until 80% confluent and were infected with HRV-16. Obtained infected cells were washed gently and split into two parts with 80% of cells for analysis and 20% re-seeded for following MOCK and HRV16 infections. This procedure was repeated for 5 times with 72 hours time interval between each infection. Samples were analysed after first, third and fifth infection (NOI:1,3,5).

# Supplement figure 2

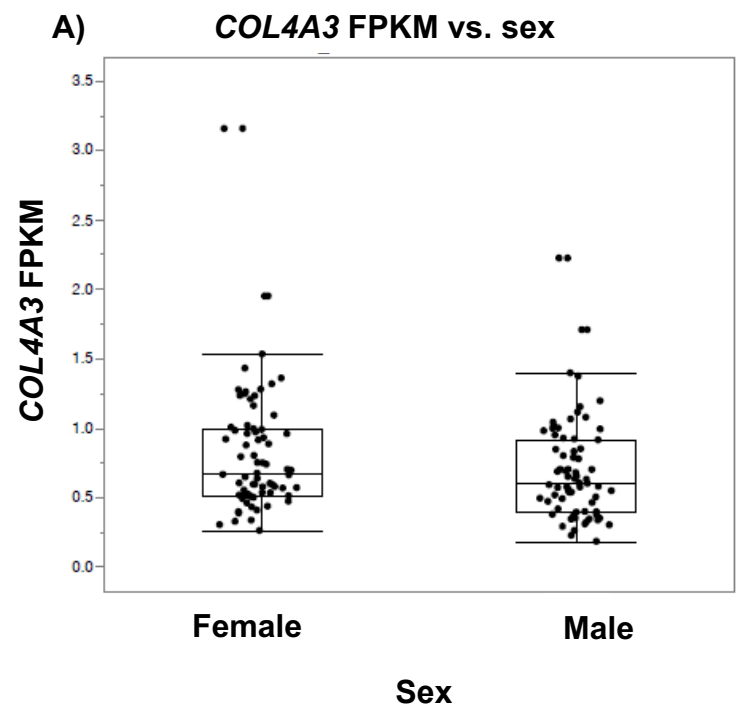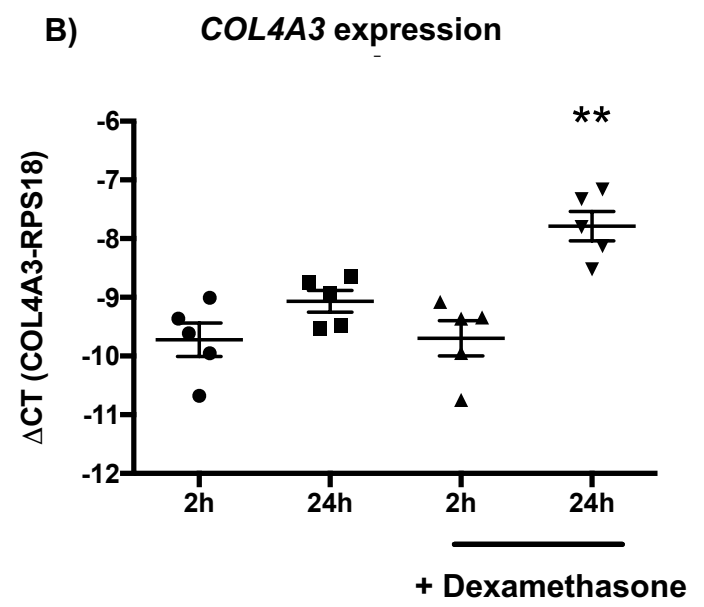

**A)** COL4A3 mRNA expression is independent of sex.

**B)** 100nM dexamethasone increases expression of COL4A3 in BEAS-2B after 24h in vitro. n=5 replicates. Mean±SEM, Kruskal-Wallis with Dunn's post-test, \*\*p<0.01.

# Supplement figure 2

C) cg11797365 vs. Sex

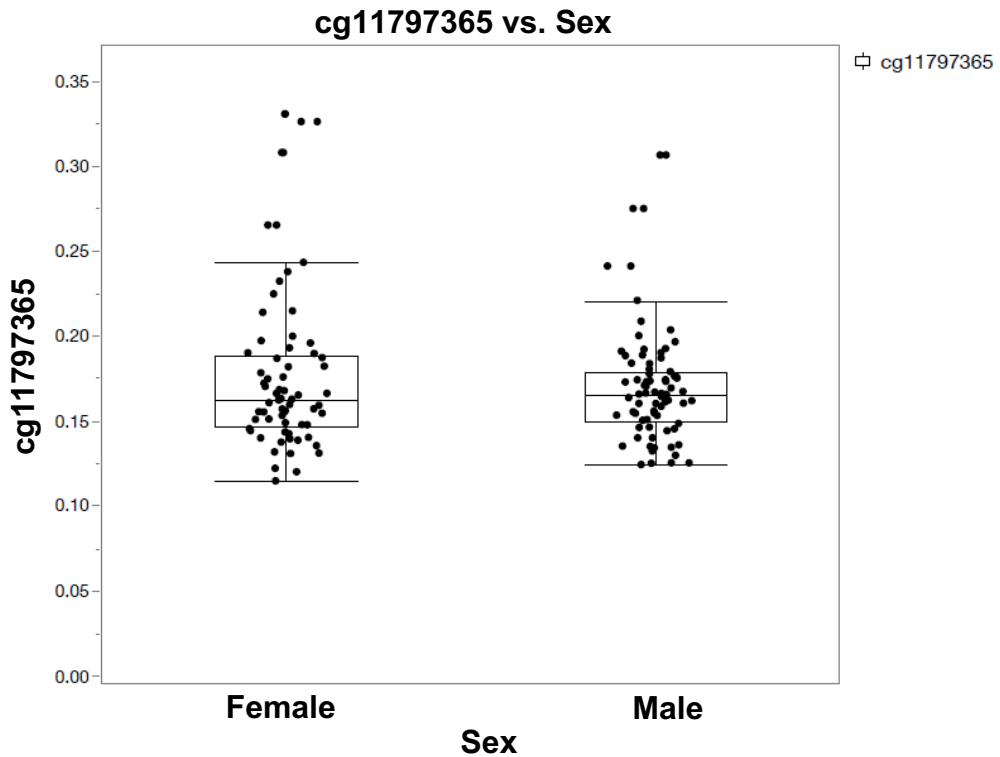

C) Level of cg11797365 methylation is not associated with sex of the patients

# Supplement figure 2

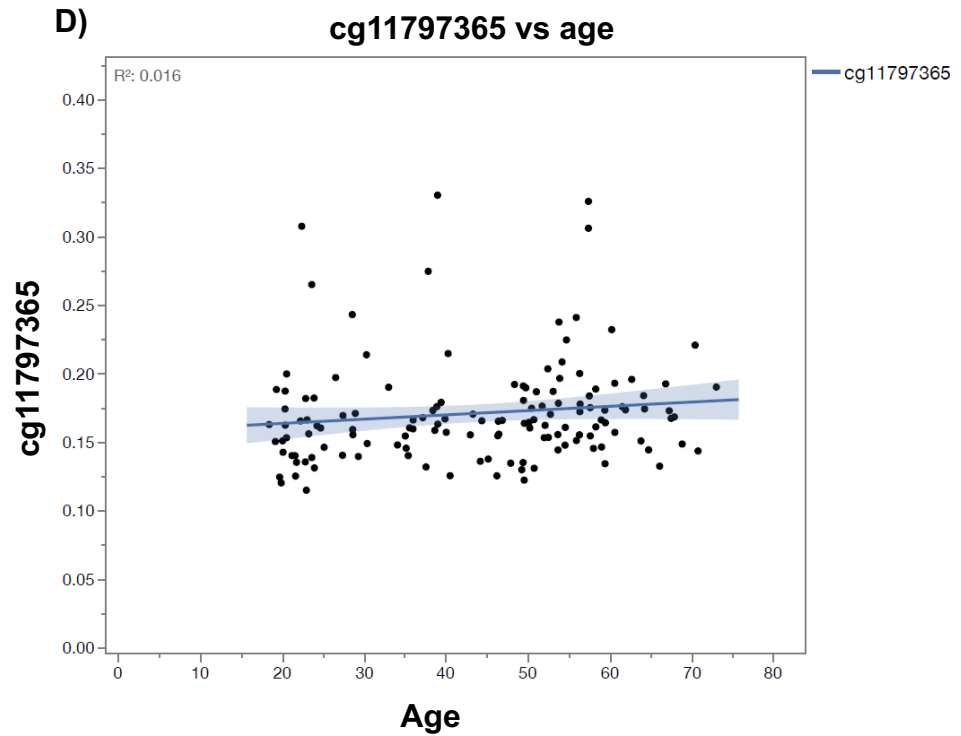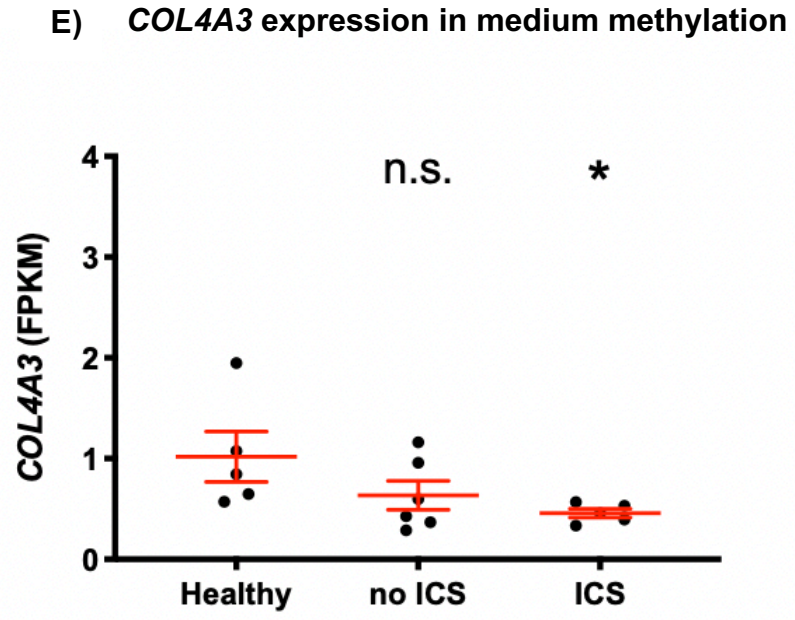

**D)** Level of cg11797365 methylation ( $\beta$ -value) is not associated with age of the patients

**E)** COL4A3 expression in control and asthmatic subjects with medium methylation ( $\beta$ -value  $\geq 0.2$ )  $n_{\text{healthy}} = 5$ ,  $n_{\text{no ICS users}} = 6$ ,  $n_{\text{ICS users}} = 5$ . (Mean $\pm$ SEM, Kruskal-Wallis with Dunn's-post test \* $p < 0.05$  compared to control subjects).

### Supplement figure 3

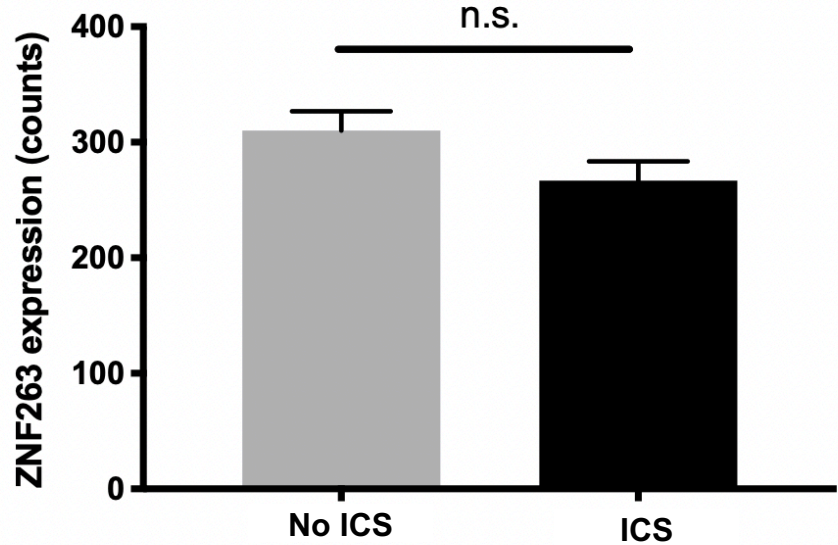

**Figure 3:** Impact of ICS on ZNF263 expression. (Mean±SD, unpaired t-test, n.s.  $p > 0.05$ ).

## Supplement figure 4

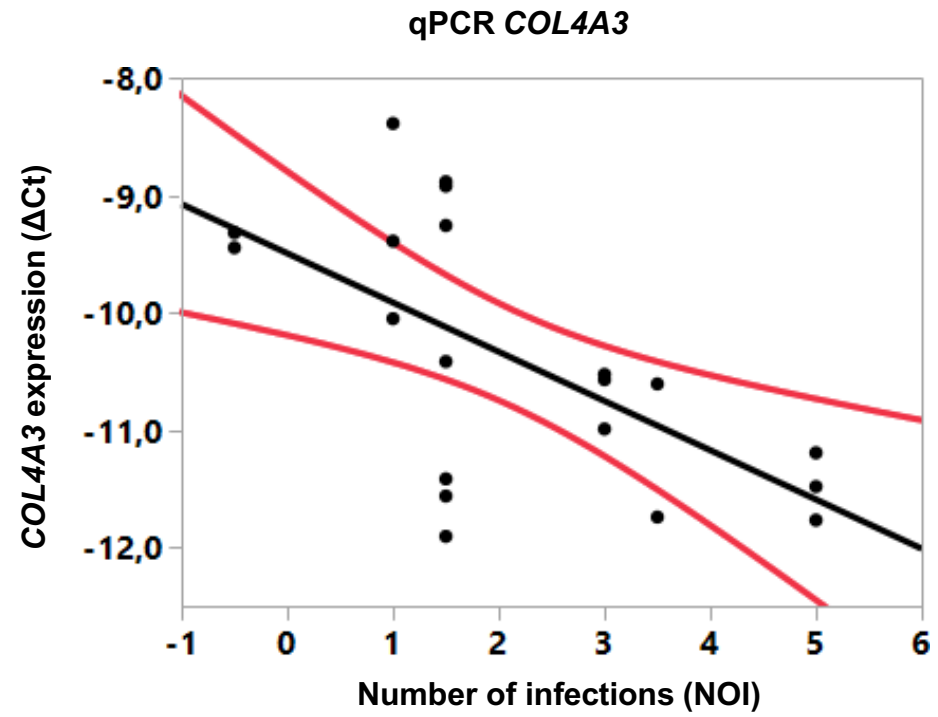

**Figure 2:** qPCR confirms a linear correlation between reduced *COL4A3* mRNA expression and NOI
