# Supplementary material for: COL4A3 expression in asthmatic epithelium depends on intronic methylation and ZNF263 binding
Source: PubMed Central journal article supplement — ERJ Open Res. 2021 Jun 7;7(2):00802-2020. doi: 10.1183/23120541.00802-2020 (PMC8181658; doi:10.1183/23120541.00802-2020), 2021-06-07
Supplement: 00802-2020.SUPPLEMENTARY_METHODS_TABLES.pdf [file 00802-2020.SUPPLEMENTARY_METHODS_TABLES.pdf]

## **Supplementary materials and methods:**

### **DNA extraction, sample preparation and hybridization protocol (BEC biopsy cohort)**

Bronchial biopsies were taken from segmental divisions of the main bronchi and frozen in Tissue-Tek (VWR, Radnor, PA) at -80°C. On the day of analysis, samples were thawed at room temperature and cut from the blocks when they were semi-solid. Samples were lysed in 600 µl RLT-plus using an IKA Ultra Turrax T10 Homogenizer. Total genomic DNA was extracted using AllPrep DNA/RNA Mini kit, according to the manufacturer's instructions (Qiagen, Venlo, the Netherlands). Concentrations of DNA were assessed using a Nanodrop-1000 and on a Labchip GX (Perkin Elmer, Waltham, MA). Eluted DNA was precipitated in ethanol, reconstituted in elution buffer and treated with sodium bisulfite. This was followed by a PCR-free whole genome amplification (Truseq DNA PCR-free workflow), after which the treated DNA was hybridized to the Infinium HumanMethylation450 BeadChip array (450k array). After hybridization, allele-specific single-base extension incorporated a fluorescent label for detection of methylated and unmethylated sites. The conversion and hybridization were performed according to the manufacturer's instructions (Illumina, San Diego, CA). Every beadchip was processed with a control of DNA from a blood sample of a single female, which was used to assess the efficiency of the normalization procedure.

### **RNA extraction, sample preparation and high-throughput sequencing (bronchial epithelial cell biopsy (BEC cohort))**

RNA samples were further processed using the TruSeq Stranded Total RNA Sample Preparation Kit (Illumina, San Diego, CA), using an automated procedure in a Caliper Sciclone NGS Workstation (PerkinElmer, Waltham, MA). In this procedure, all cytoplasmic and mitochondrial rRNA was removed (RiboZero Gold kit). The obtained

cDNA fragment libraries were loaded in pools of multiple samples onto an Illumina HiSeq2500 sequencer using default parameters for paired-end sequencing (2 × 100 bp). The trimmed fastQ files were aligned to build b37 of the human reference genome using HISAT (version 0.1.5) allowing for 2 mismatches. Before gene quantification SAMtools (version 1.2) was used to sort the aligned reads. The gene level quantification was performed by HTSeq (version 0.6.1p1) using Ensembl version 75 as gene annotation database. Quality control (QC) metrics were calculated for the raw sequencing data, using the FastQC tool (version 0.11.3) (Andrews 2010). Alignments of 220 subjects were obtained. QC metrics were calculated for the aligned reads using Picard-tools (version 1.130) (<http://picard.sourceforge.net>) CollectRnaSeqMetrics, MarkDuplicates, CollectInsertSize-Metrics and SAMtools flagstat. In addition, we checked for concordance between sexlinked (XIST and Y-chromosomal genes) gene expression and reported sex. All samples were concordant.

#### **Quality control, sample filtering, probe filtering and normalization (BEC cohort)**

Raw intensity values were read from IDAT-files and converted to  $\beta$  values using the minfi-package. We identified samples with insufficient quality using the R-package MethylAid, based on five diagnostic filter variables with the following thresholds: MU = 10.5, OP = 11.75, BS = 12.5, HC = 13.25, and DP = 0.95. Genotypes from 65 single nucleotide polymorphisms (SNP) probes on the 450k array were compared to previously acquired genotypes from blood samples and discordant samples were discarded as swapped or contaminated samples. We excluded probes which had intensities indistinguishable from background levels (>1% of samples at P = 0.05), probes which were cross-reactive, probes which had SNPs segregating at the interrogation or extension site (MAF > 10%), and type I probes which displayed high

intensity signals. In addition, we excluded all X-linked and Y-linked probes. After probe-filtering, raw  $\beta$ -values were background-corrected and normalized using the dasen method from the wateRmelon-package.

**Supplementary table 1: Pyrosequencing primers**

Primer for amplification were designed using Pyromark Assay Design 2.0 software (Qiagen, Hilden, Germany) under recommended conditions.

|                                                                                                    |                                                                                      |
|----------------------------------------------------------------------------------------------------|--------------------------------------------------------------------------------------|
| <b>Gene</b>                                                                                        | <i>COL4A3</i>                                                                        |
| <b>CpG site</b>                                                                                    | cg11797365                                                                           |
| <b>F primer</b>                                                                                    | ATTTTTGATTTTTAGGTATTGGATAAGTTT bio                                                   |
| <b>R primer</b>                                                                                    | CCCCCACTTCCATCCCTCCTC                                                                |
| <b>S primer</b>                                                                                    | ACTTCACCCAAATCCC                                                                     |
| <b>Sequence analysed</b>                                                                           | YAAACAAACA ACYAACRAAA AAAACAAAC YAAAATACCC<br>CYAAACAAAT AAAATACYCYAAACTAAAAA AAAAAA |
| F primer: forward primer; R primer: reverse primer; S primer: sequence primer; bio: biotinylation. |                                                                                      |

**Supplementary table 2: ChIP- Seq primers list**

| <b>Primer name</b>                                                                                                                                         | <b>Sequence</b>                   | <b>Purpose</b>   |
|------------------------------------------------------------------------------------------------------------------------------------------------------------|-----------------------------------|------------------|
| <i>Untr4</i>                                                                                                                                               | Human negative control primer set | Negative control |
|                                                                                                                                                            |                                   |                  |
| <b>h ANO7_+16k</b>                                                                                                                                         | GCTTGAGGTGATTGAGGTGTG             | Positive control |
| <b>h ANO7_+16k</b>                                                                                                                                         | CAAGGCCCTCTGTGACTC                |                  |
|                                                                                                                                                            |                                   |                  |
| <b>h COL4A3_+569</b>                                                                                                                                       | TGTCCAGTGCCTAGGAGTCAG             | Test site        |
| <b>h COL4A3_+569</b>                                                                                                                                       | TCCCTGGCGATTATCTATGTG             |                  |
|                                                                                                                                                            |                                   |                  |
| <b>h AHDC1_-462</b>                                                                                                                                        | CTCCCTCCTCCTGCCTTCT               | Test site        |
| <b>h AHDC1_-462</b>                                                                                                                                        | GCGGACCAGACAGACAGAC               |                  |
|                                                                                                                                                            |                                   |                  |
| <b>h AP1S3_+46</b>                                                                                                                                         | GCTTAGACCATGGCTGCTTC              | Test site        |
| <b>h AP1S3_+46</b>                                                                                                                                         | GAGGAGGAGAAGGGAGGAGA              |                  |
| ANO7: Anoctamin-7; AHDC1: AT-hook DNA binding motif containing 1; AP1S3: Adapted related protein complex 1 subunit sigma 3; Untr4: Untranscribed genomic 4 |                                   |                  |

**Supplementary table 3:** Univariate analysis: *COL4A3* expression is independent of age, weight, atopy, and ICS use

| Variable              | Spearman's $\rho$ co-efficient | p-value |
|-----------------------|--------------------------------|---------|
| <b>Disease status</b> | -0.250                         | 0.002   |
| <b>Sex</b>            | 0.160                          | 0.055   |
| <b>Atopy</b>          | 0.104                          | 0.212   |
| <b>Weight</b>         | -0.085                         | 0.308   |
| <b>ICS</b>            | -0.082                         | 0.326   |
| <b>Age</b>            | -0.014                         | 0.869   |

**Supplementary table 4:** Multivariate analysis: *COL4A3* expression correlates with disease status and sex but not with age, atopy and use of ICS

| Variable              | Estimate | Std Error | p-value | Lower 95% | Upper 95% |
|-----------------------|----------|-----------|---------|-----------|-----------|
| <b>Intercept</b>      | 0.831    | 0.421     | 1.972   | 0.051     | -0.002    |
| <b>disease status</b> | -0.103   | 0.048     | -2.123  | 0.036     | -0.198    |
| <b>Sex (female)</b>   | 0.065    | 0.034     | 1.893   | 0.061     | -0.003    |
| <b>age</b>            | 0.000    | 0.002     | 0.174   | 0.862     | -0.004    |
| <b>ICS</b>            | 0.133    | 0.101     | 1.319   | 0.189     | -0.066    |
| <b>Atopy</b>          | -0.123   | 0.405     | -0.303  | 0.763     | -0.923    |

**Supplementary table 5:** DNA Methylation values at cg11797365 for ICS stratification

|                   | Statistics         | Healthy | Asthma, no ICS | Asthma, ICS users |
|-------------------|--------------------|---------|----------------|-------------------|
| <b>cg11797365</b> | Mean               | 0.17    | 0.19           | 0.17              |
|                   | Std Dev            | 0.03    | 0.05           | 0.04              |
|                   | Number of subjects | 70      | 26             | 44                |

**Supplementary table 6:** Quantitative ChIP-Seq analysis

| Methylation (%) at cg11797365 | BEAS-2Bs  | NHBEs      | p-value |
|-------------------------------|-----------|------------|---------|
| <b>Mean (SD)</b>              | 6.4 (1.0) | 10.7 (1.7) | 0.0003  |
| <b>n</b>                      | 9         | 10         |         |

**Supplementary table 7:** Regression analysis: No direct association of gene expression and levels of methylation

| Variable                | Estimate | Std Error | p-value  |
|-------------------------|----------|-----------|----------|
| <b>Intercept</b>        | 0.110    | 0.004     | 5.19E-77 |
| <b>z-value (COL4A3)</b> | -0.001   | 0.003     | 0.832    |
| <b>Data Set [1-0]</b>   | 0.061    | 0.005     | 2.1E-28  |

Data set [1-0]: 0- Nicodemus Johnson cohort; 1- BEC cohort

**Supplementary table 8:** Regression analysis of gene expression, levels of DNA methylation and outcome of asthma

| Variable                | Estimate | Std Error | p-value | Lower 95% | Upper 95% |
|-------------------------|----------|-----------|---------|-----------|-----------|
| <b>Intercept</b>        | -1.821   | 0.710     | 0.010   | -3.273    | -0.476    |
| <b>cg11797365</b>       | 11.904   | 5.326     | 0.025   | 2.057     | 23.117    |
| <b>Data Set [1-0]</b>   | -1.505   | 0.450     | 0.001   | -2.417    | -0.645    |
| <b>age</b>              | 0.030    | 0.011     | 0.007   | 0.008     | 0.052     |
| <b>Sex [Female]</b>     | 0.294    | 0.158     | 0.062   | -0.013    | 0.606     |
| <b>z-value (COL4A3)</b> | -0.350   | 0.178     | 0.050   | -0.716    | -0.015    |

Data set [1-0]: 0- Nicodemus Johnson cohort; 1- BEC cohort
